# Supplementary material for: Barriers and bridges to infection prevention and control: results of a qualitative case study of a Netherlands' surgical unit
Source: PubMed Central journal article supplement — BMJ Open. 2012 Mar 7;2(2):e000511. doi: 10.1136/bmjopen-2011-000511 (PMC3298832; doi:10.1136/bmjopen-2011-000511), 2012-03-07
Supplement: bmjopen-2011-000511-s1.pdf [file bmjopen-2011-000511-s1.pdf]

[Back to normal](#)■ **Qualitative research review guidelines – RATS**

| ASK THIS OF THE MANUSCRIPT                                                                                                                                                                                                                                                                                                                                                                                                    | THIS SHOULD BE INCLUDED IN THE MANUSCRIPT                                                                                                                                                                                           |
|-------------------------------------------------------------------------------------------------------------------------------------------------------------------------------------------------------------------------------------------------------------------------------------------------------------------------------------------------------------------------------------------------------------------------------|-------------------------------------------------------------------------------------------------------------------------------------------------------------------------------------------------------------------------------------|
| <b>R Relevance of study question</b><br><br>Is the research question interesting?<br><br>Is the research question relevant to clinical practice, public health, or policy?                                                                                                                                                                                                                                                    | Research question explicitly stated ✓<br><br>Research question justified and linked to the existing knowledge base (empirical research, theory, policy) ✓                                                                           |
| <b>A Appropriateness of qualitative method</b><br><br>Is qualitative methodology the best approach for the study aims?<br><i>Interviews:</i> experience, perceptions, behaviour, practice, process<br><i>Focus groups:</i> group dynamics, convenience, non-sensitive topics<br><i>Ethnography:</i> culture, organizational behaviour, interaction<br><i>Textual analysis:</i> documents, art, representations, conversations | Study design described and justified e.g., why was a particular method (i.e., interviews) chosen? ✓                                                                                                                                 |
| <b>T Transparency of procedures</b><br><br><i>Sampling</i><br><br>Are the participants selected the most appropriate to provide access to type of knowledge sought by the study?<br>Is the sampling strategy appropriate?                                                                                                                                                                                                     | Criteria for selecting the study sample justified and explained ✓<br><i>theoretical:</i> based on pre conceived or emergent theory<br><i>purposive:</i> diversity of opinion<br><i>volunteer:</i> feasibility, hard-to-reach groups |
| <i>Recruitment</i><br><br>Was recruitment conducted using appropriate methods?<br>Is the sampling strategy appropriate?<br><br>Could there be selection bias?                                                                                                                                                                                                                                                                 | Details of how recruitment was conducted and by whom ✓<br><br>Details of who chose not to participate and why ✓                                                                                                                     |
| <i>Data collection</i><br><br>Was collection of data systematic and comprehensive?<br><br>Are characteristics of the study group and setting clear?<br><br>Why and when was data collection stopped, and is this reasonable?                                                                                                                                                                                                  | Method (s) outlined and examples given (e.g., interview questions) ✓<br><br>Study group and setting clearly described ✓<br><br>End of data collection justified and described ✓                                                     |
| <i>Role of researchers</i><br><br>Is the researcher (s) appropriate? How might they bias (good and bad) the conduct of the study and results?                                                                                                                                                                                                                                                                                 | Do the researchers occupy dual roles (clinician and researcher)? ✓<br>Are the ethics of this discussed? Do the researcher(s) critically examine their own ✓                                                                         |

|                                                                                                                                                                                                                                                  |                                                                                                                                                                                                                            |
|--------------------------------------------------------------------------------------------------------------------------------------------------------------------------------------------------------------------------------------------------|----------------------------------------------------------------------------------------------------------------------------------------------------------------------------------------------------------------------------|
|                                                                                                                                                                                                                                                  | influence on the formulation of the research question, data collection, and interpretation?                                                                                                                                |
| <i>Ethics</i>                                                                                                                                                                                                                                    |                                                                                                                                                                                                                            |
| Was informed consent sought and granted?                                                                                                                                                                                                         | Informed consent process explicitly and clearly detailed ✓                                                                                                                                                                 |
| Were participants' anonymity and confidentiality ensured?                                                                                                                                                                                        | Anonymity and confidentiality discussed ✓                                                                                                                                                                                  |
| Was approval from an appropriate ethics committee received?                                                                                                                                                                                      | Ethics approval cited ✓                                                                                                                                                                                                    |
| <b>S Soundness of interpretive approach</b>                                                                                                                                                                                                      |                                                                                                                                                                                                                            |
| <i>Analysis</i>                                                                                                                                                                                                                                  |                                                                                                                                                                                                                            |
| Is the type of analysis appropriate for the type of study?<br><i>thematic</i> : exploratory, descriptive, hypothesis generating<br><i>framework</i> : e.g., policy<br><i>constant comparison/grounded theory</i> : theory generating, analytical | Analytic approach described in depth and justified ✓                                                                                                                                                                       |
| Are the interpretations clearly presented and adequately supported by the evidence?                                                                                                                                                              | <i>Indicators of quality</i> : Description of how themes were derived from the data (inductive or deductive) ✓                                                                                                             |
| Are quotes used and are these appropriate and effective?                                                                                                                                                                                         | Evidence of alternative explanations being sought ✓                                                                                                                                                                        |
|                                                                                                                                                                                                                                                  | Analysis and presentation of negative or deviant cases ✓                                                                                                                                                                   |
|                                                                                                                                                                                                                                                  | Description of the basis on which quotes were chosen ✓                                                                                                                                                                     |
|                                                                                                                                                                                                                                                  | Semi-quantification when appropriate ✓                                                                                                                                                                                     |
|                                                                                                                                                                                                                                                  | Illumination of context and/or meaning, richly detailed ✓                                                                                                                                                                  |
| Was trustworthiness/reliability of the data and interpretations checked?                                                                                                                                                                         | Method of reliability check described and justified ✓<br>e.g., was an audit trail, triangulation, or member checking employed? Did an independent analyst review data and contest themes? How were disagreements resolved? |
| <i>Discussion and presentation</i>                                                                                                                                                                                                               |                                                                                                                                                                                                                            |
| Are findings sufficiently grounded in a theoretical or conceptual framework?                                                                                                                                                                     | Findings presented with reference to existing theoretical and empirical literature, and how they contribute ✓                                                                                                              |
| Is adequate account taken of previous knowledge and how the findings add?                                                                                                                                                                        |                                                                                                                                                                                                                            |
| Are the limitations thoughtfully considered?                                                                                                                                                                                                     | Strengths and limitations explicitly described and discussed ✓                                                                                                                                                             |
| Is the manuscript well written and accessible?                                                                                                                                                                                                   | Evidence of following guidelines (format, word count) ✓                                                                                                                                                                    |
|                                                                                                                                                                                                                                                  | Detail of methods or additional quotes contained in appendix ✓                                                                                                                                                             |
|                                                                                                                                                                                                                                                  | Written for a health sciences audience                                                                                                                                                                                     |
| Are <u>red flags</u> present? these are common features of ill conceived or poorly executed qualitative studies, are a cause for concern, and must be viewed critically. They might be                                                           | <i>Grounded theory</i> : not a simple content analysis but a complex, sociological, theory generating approach<br>Jargon: descriptions that are trite, pat,                                                                |

fatal flaws, or they may result from lack of detail or clarity.

or jargon filled should be viewed sceptically  
*Over interpretation:* interpretation must be grounded in "accounts" and semi-quantified if possible or appropriate  
*Seems anecdotal, self evident:* may be a superficial analysis, not rooted in conceptual framework or linked to previous knowledge, and lacking depth  
*Consent process thinly discussed:* may not have met ethics requirements  
*Doctor-researcher:* consider the ethical implications for patients and the bias in data collection and interpretation

The RATS guidelines modified for BioMed Central are copyright Jocelyn Clark, BMJ. They can be found in Clark JP: **How to peer review a qualitative manuscript**. In *Peer Review in Health Sciences*. Second edition. Edited by Godlee F, Jefferson T. London: BMJ Books; 2003:219-235
